# Supplementary material
Source: Springer Nature journal article supplement (https://www.springermedizin.de/resource/supplementary/13018_2010_252_MOESM10_ESM.pdf/9636630)

Review: Is Surgical Intervention More Effective Than Non-surgical Treatment for CTS  
 Comparison: 04 Surgery vs non surgery at 3 months  
 Outcome: 01 Patient self-reported symptom score at 3 months

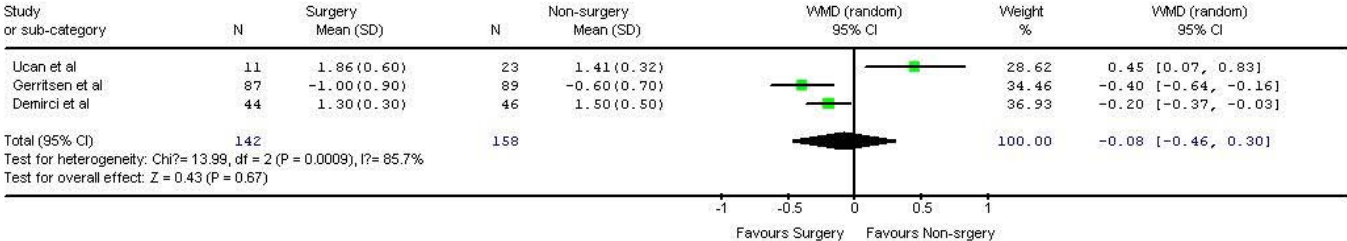

Supplement: MOESM10 [file 9636630]
